# Supplementary material for: Effective control of SARS-CoV-2 transmission in Wanzhou, China
Source: Springer Nature journal article supplement (doi:10.1038/s41591-020-01178-5), 2020-11-30
Supplement: 41591_2020_1178_MOESM1_ESM.pdf [file 41591_2020_1178_MOESM1_ESM.pdf]

---

**Supplementary information**

---

**Effective control of SARS-CoV-2  
transmission in Wanzhou, China**

---

In the format provided by the  
authors and unedited

**Supplementary Table 1. Characteristics of Sample Excluded in the Multilevel Logistic Regression.**

|                                        | <b>Cases (N=89)</b> | <b>Negative Close Contacts (N=637)</b> |
|----------------------------------------|---------------------|----------------------------------------|
| <b>Sex</b>                             |                     |                                        |
| Men                                    | 45                  | 353                                    |
| Women                                  | 44                  | 284                                    |
| <b>Age (years)</b>                     |                     |                                        |
| <18                                    | 3                   | 76                                     |
| 18-49                                  | 51                  | 318                                    |
| 50-69                                  | 25                  | 199                                    |
| ≥70                                    | 10                  | 43                                     |
| <b>Timing of contact</b>               |                     |                                        |
| Day ≤5                                 | 22                  | 29                                     |
| Day >5                                 | 4                   | 2                                      |
| <b>Duration of contact (hours)</b>     |                     |                                        |
| <8                                     | 6                   | 498                                    |
| ≥8                                     | 5                   | 130                                    |
| <b>Frequency of contact</b>            |                     |                                        |
| Occasional/not so often                | 17                  | 473                                    |
| Often                                  | 15                  | 155                                    |
| <b>Mode of contact</b>                 |                     |                                        |
| Living together <sup>†</sup>           | 17                  | 122                                    |
| Dining together                        | 15                  | 233                                    |
| Other                                  | 9                   | 273                                    |
| <b>Place of contact</b>                |                     |                                        |
| Home <sup>‡</sup>                      | 27                  | 322                                    |
| Other                                  | 15                  | 306                                    |
| <b>Relationship to the source case</b> |                     |                                        |
| Relatives                              | 23                  | 308                                    |
| Other                                  | 18                  | 320                                    |

<sup>†</sup> Includes contacts living in the same room, the same dwelling unit, or the same household.

<sup>‡</sup> Includes contacts occurring at one's own home or at a relative's home during a visit.

**Supplementary Table 2. Demographic Characteristics and Contact Patterns of COVID-19 Cases and Negative Close Contacts in Wanzhou, Chongqing.**

|                                                 | Cases (N=183)       |                     | Negative Close Contacts (N=1983) | Total (N=2166)   | Chi-Square Test/ Fisher's Exact Test (P value) |
|-------------------------------------------------|---------------------|---------------------|----------------------------------|------------------|------------------------------------------------|
|                                                 | Symptomatic (N=123) | Asymptomatic (N=60) |                                  |                  |                                                |
| <b>Sex — no./total no. (%)</b>                  |                     |                     |                                  |                  |                                                |
| Men                                             | 69/1170 (5.9)       | 26/1170 (2.2)       | 1075/1169 (91.9)                 | 1170             | 0.155                                          |
| Women                                           | 49/988 (5.0)        | 34/988 (3.4)        | 905/989 (91.6)                   | 988              |                                                |
| Missing                                         | 5                   | 0                   | 3                                | 8                |                                                |
| <b>Age (years) — mean±SD (total no.)</b>        | 49.4±16.9 (118)     | 36.9±15.5 (60)      | 42.5±19.6 (1979)                 | 42.7±19.5 (2157) | <0.001                                         |
| Missing                                         | 5                   | 0                   | 4                                | 9                |                                                |
| <b>Timing of contact — no./total no. (%)</b>    |                     |                     |                                  |                  |                                                |
| Day ≤5                                          | 39/1083 (3.6)       | 29/1083 (2.7)       | 1015/1083 (93.7)                 | 1083             | 0.008                                          |
| Day >5                                          | 12/372 (3.2)        | 1/273 (0.3)         | 324/373 (96.5)                   | 372              |                                                |
| Missing                                         | 72                  | 30                  | 1983                             | 711              |                                                |
| <b>Frequency of contact — no./total no. (%)</b> |                     |                     |                                  |                  |                                                |
| Occasional                                      | 20/1206 (1.7)       | 10/1206 (0.8)       | 1176/1206 (97.5)                 | 1206             | <0.001                                         |
| Not so often                                    | 12/386 (3.1)        | 5/386 (1.3)         | 369/386 (95.6)                   | 386              |                                                |
| Often                                           | 25/466 (5.4)        | 15/466 (3.2)        | 426/466 (91.4)                   | 466              |                                                |
| Missing                                         | 66                  | 30                  | 12                               | 108              |                                                |
| <b>Duration of contact — no./total no. (%)</b>  |                     |                     |                                  |                  |                                                |
| <8 hours                                        | 26/1761 (1.5)       | 16/1761 (0.9)       | 1719/1761 (97.6)                 | 1761             | <0.001                                         |
| ≥8 hours                                        | 12/276 (4.4)        | 12/276 (4.4)        | 252/276 (91.3)                   | 276              |                                                |
| Missing                                         | 85                  | 32                  | 12                               | 129              |                                                |
| <b>Mode of contact — no. /total no. (%)</b>     |                     |                     |                                  |                  |                                                |

|                                                              | Cases (N=183)       |                     | Negative Close Contacts (N=1983) | Total (N=2166) | Chi-Square Test/ Fisher's Exact Test (P value) |
|--------------------------------------------------------------|---------------------|---------------------|----------------------------------|----------------|------------------------------------------------|
|                                                              | Symptomatic (N=123) | Asymptomatic (N=60) |                                  |                |                                                |
| Living together <sup>†</sup>                                 | 23/401 (5.7)        | 9/401 (2.2)         | 369/401 (92.0)                   | 401            | 0.014                                          |
| Dining together                                              | 27/1065 (2.5)       | 16/1065 (1.5)       | 1022/1065 (96.0)                 | 1065           |                                                |
| Other                                                        | 13/601 (2.2)        | 8/601 (1.3)         | 580/601 (96.5)                   | 601            |                                                |
| Missing                                                      | 60                  | 27                  | 12                               | 99             |                                                |
| <b>Place of contact — no./total no. (%)</b>                  |                     |                     |                                  |                |                                                |
| Home <sup>‡</sup>                                            | 39/1326 (2.9)       | 24/1326 (1.8)       | 1263/1326 (95.3)                 | 1326           | 0.002                                          |
| Healthcare facility                                          | 1/155 (0.6)         | 0/155 (0.0)         | 154/155 (99.4)                   | 155            |                                                |
| Workplace                                                    | 1/61 (1.6)          | 1/61 (1.6)          | 59/61 (96.7)                     | 61             |                                                |
| Place for recreational activities                            | 8/64 (12.5)         | 3/64 (4.7)          | 53/64 (82.8)                     | 64             |                                                |
| Other                                                        | 14/462 (3.0)        | 6/462 (1.3)         | 442/462 (95.7)                   | 462            |                                                |
| Missing                                                      | 60                  | 26                  | 12                               | 98             |                                                |
| <b>Relationship with the source case — no./total no. (%)</b> |                     |                     |                                  |                |                                                |
| Relatives                                                    | 33/1212 (2.7)       | 26/1212 (2.2)       | 1153/1212 (95.1)                 | 1212           | 0.002                                          |
| Friends/colleagues                                           | 16/249 (6.4)        | 3/249 (1.2)         | 230/249 (92.4)                   | 249            |                                                |
| Neighbors/fellows                                            | 0/161 (0.0)         | 1/161 (0.6)         | 160/161 (99.4)                   | 161            |                                                |
| Medical care providers/patients                              | 3/100 (0.3)         | 0/100 (0.0)         | 97/100 (97.0)                    | 100            |                                                |
| Passengers sharing the same transportation                   | 3/192 (1.6)         | 0/192 (0.0)         | 189/192 (98.4)                   | 192            |                                                |
| Other                                                        | 7/153 (4.6)         | 4/153 (2.6)         | 142/153 (92.8)                   | 153            |                                                |
| Missing                                                      | 61                  | 26                  | 12                               | 99             |                                                |

COVID-19 denotes coronavirus disease 2019. SD: standard deviation.

<sup>†</sup> Includes contacts living in the same room, the same dwelling unit, or the same household.

<sup>‡</sup> Includes contacts occurring at one's own home, or at a relative's home during a visit.

**Supplementary Table 3. Contact Patterns for Presymptomatic and Asymptomatic Transmission.**

|                                                         | <b>Presymptomatic Cases</b> | <b>Asymptomatic Cases</b> | <b>Negative Close Contacts</b> |
|---------------------------------------------------------|-----------------------------|---------------------------|--------------------------------|
| <b>Timing of contact — no. /total no. (%)</b>           |                             |                           |                                |
| Day ≤5                                                  | 28/789 (3.6)                | 24/789 (3.0)              | 737/789 (93.4)                 |
| Day >5                                                  | 6/162 (3.7)                 | 1/162 (0.6)               | 155/162 (95.7)                 |
| Missing                                                 | 0/142 (0.0)                 | 4/142 (2.8)               | 138/142 (97.8)                 |
| <b>Duration of contact (hours) — no. /total no. (%)</b> |                             |                           |                                |
| <8                                                      | 14/946 (1.4)                | 12/946 (1.3)              | 921/946 (97.4)                 |
| ≥8                                                      | 8/123 (6.5)                 | 7/123 (5.7)               | 108/123 (87.8)                 |
| Missing                                                 | 13/24 (54.2)                | 10/24 (41.7)              | 1 (4.2)                        |
| <b>Frequency of contact — no. /total no. (%)</b>        |                             |                           |                                |
| Occasional/not so often                                 | 10/784 (1.3)                | 9/784 (1.2)               | 765/784 (97.6)                 |
| Often                                                   | 17/292 (5.8)                | 11/292 (3.8)              | 264/292 (90.4)                 |
| Missing                                                 | 7/17 (41.2)                 | 9/17 (52.9)               | 1/17 (5.9)                     |
| <b>Mode of contact — no. /total no. (%)</b>             |                             |                           |                                |
| Living together <sup>†</sup>                            | 14/261 (5.4)                | 6/261 (2.3)               | 241/261 (92.3)                 |
| Dining together                                         | 12/623 (1.9)                | 14/623 (2.3)              | 597/623 (95.8)                 |
| Other                                                   | 4/198 (2.40)                | 3/198 (1.5)               | 191/198 (96.5)                 |
| Missing                                                 | 4/11 (36.4)                 | 6/11 (54.6)               | 1/11 (9.1)                     |
| <b>Place of contact</b>                                 |                             |                           |                                |
| Home <sup>‡</sup>                                       | 22/785 (2.8)                | 18/785 (2.3)              | 745/785 (94.9)                 |
| Other                                                   | 8/297 (2.7)                 | 5/297 (1.7)               | 284/297 (95.6)                 |
| Missing                                                 | 4/11 (36.4)                 | 6/11 (54.6)               | 1/11 (9.1)                     |
| <b>Relationship to the source case</b>                  |                             |                           |                                |
| Relatives                                               | 20/760 (2.6)                | 20/760 (2.6)              | 720/760 (94.7)                 |
| Other                                                   | 10/323 (3.1)                | 4/323 (1.2)               | 309/323 (95.7)                 |
| Missing                                                 | 4/10 (40.0)                 | 5/10 (50.0)               | 1/10 (10.0)                    |

<sup>†</sup> Includes contacts living in the same room, the same dwelling unit, or the same household.

<sup>‡</sup> Includes contacts occurring at one's own home or at a relative's home during a visit.

**Supplementary Table 4. Estimated Posterior Median of Incubation Period for Symptomatic Cases (N=72) by Different Parametric Forms of the Incubation Period Distribution.**

|                     | <b>Posterior median<br/>(days, 95% CI)</b> | <b>LOO IC<sup>s</sup></b> |
|---------------------|--------------------------------------------|---------------------------|
| <b>Distribution</b> |                                            |                           |
| Weibull             | 11.95 (10.38-13.75)                        | 463.0                     |
| Gamma               | 11.77 (10.17-13.70)                        | 464.9                     |
| Lognormal           | 9.53 (8.02-11.30)                          | 470.4                     |

Note: Only G2-G4 symptomatic cases (N=72) were included in the calculation of the posterior median of incubation period which requires information on the date of contact with the source case and the date of symptom onset. G1 symptomatic cases were excluded because there was no information on when they had contact with their source cases.

CI: confidence interval; LOO IC: leave-one-out information criterion.

<sup>s</sup> LOO IC indicates the goodness-of-fit; lower values indicate a better fit and differences >2 are statistically relevant.

**Supplementary Table 5. Incubation Period by Different Definition of Date of Contact.**

|                                                | <b>Symptomatic cases with one close contact only</b> | <b>Symptomatic cases with the first and last date of contact</b> | <b>All symptomatic cases (N=72)</b> |
|------------------------------------------------|------------------------------------------------------|------------------------------------------------------------------|-------------------------------------|
| <b>Incubation period – mean±SD (Total no.)</b> |                                                      |                                                                  |                                     |
| Using midpoint                                 | 10.40±6.33 (42)                                      | 11.15±8.25 (30)                                                  | 10.71±7.37 (72)                     |
| Using first contact date                       | 10.40±6.33 (42)                                      | 13.27±8.45 (30)                                                  | 11.60±7.15 (72)                     |
| Using last contact date                        | 10.40±6.33 (42)                                      | 9.03±8.49 (30)                                                   | 9.83±7.28 (72)                      |

Note: Only G2-G4 symptomatic cases (N=72) were included in the calculation of the posterior median of incubation period. G1 symptomatic cases were excluded because there was no information on the date when they had contact with their source cases.

SD: standard deviation.
